# Supplementary material for: Protocol for validation of the Global Scales for Early Development (GSED) for children under 3 years of age in seven countries
Source: BMJ Open. 2023 Jan 24;13(1):e062562. doi: 10.1136/bmjopen-2022-062562 (PMC9884878; doi:10.1136/bmjopen-2022-062562)
Supplement: Supplementary data [file bmjopen-2022-062562supp002.pdf]

## Supplementary file 2 – Visit schedule

Table S2a. Visit Schedule for the GSED Validation Study (all sites except the Netherlands)

| Main Study Only<br>[No Sub-sample]                                                                                                                | Inter- Rater<br>Reliability Sub- Sample                                                                 | Test- Retest<br>Reliability Sub- Sample                                                                                | Concurrent Sub- Sample 1<br>[LF First]                                                                                                       | Concurrent Sub- Sample 2<br>[BSID III First]                                                                                                        |
|---------------------------------------------------------------------------------------------------------------------------------------------------|---------------------------------------------------------------------------------------------------------|------------------------------------------------------------------------------------------------------------------------|----------------------------------------------------------------------------------------------------------------------------------------------|-----------------------------------------------------------------------------------------------------------------------------------------------------|
| <b>Visit 1 [At Home]</b>                                                                                                                          |                                                                                                         |                                                                                                                        |                                                                                                                                              |                                                                                                                                                     |
| Eligibility and Consent                                                                                                                           | Eligibility and Consent                                                                                 | Eligibility and Consent                                                                                                | Eligibility and Consent                                                                                                                      | Eligibility and Consent                                                                                                                             |
| COVID Questionnaire                                                                                                                               | COVID Questionnaire                                                                                     | COVID Questionnaire                                                                                                    | COVID Questionnaire                                                                                                                          | COVID Questionnaire                                                                                                                                 |
| Contextual                                                                                                                                        | Contextual                                                                                              | Contextual                                                                                                             | Contextual                                                                                                                                   | Contextual                                                                                                                                          |
| GSED Short form [SF]                                                                                                                              | GSED Short form [SF]                                                                                    | GSED Short form [SF]                                                                                                   | GSED Short form [SF]                                                                                                                         | GSED Short form [SF]                                                                                                                                |
| GSED Psychosocial form [PF]                                                                                                                       | GSED Psychosocial form [PF]                                                                             | GSED Psychosocial form [PF]                                                                                            | GSED Psychosocial form [PF]                                                                                                                  | GSED Psychosocial form [PF]                                                                                                                         |
| HOME Inventory or Family Care Indicators (FCI)                                                                                                    | HOME Inventory or Family Care Indicators (FCI)                                                          | HOME Inventory or Family Care Indicators (FCI)                                                                         | HOME Inventory or Family Care Indicators (FCI)                                                                                               | HOME Inventory or Family Care Indicators (FCI)                                                                                                      |
| Anthropometrics*                                                                                                                                  | Anthropometrics*                                                                                        | Anthropometrics*                                                                                                       | Anthropometrics*                                                                                                                             | Anthropometrics*                                                                                                                                    |
| <b>Visit 2 [At home, clinic, or other setting within 48 hours of visit 1]<br/>Note: For Concurrent Sample, the Visit is at the Clinic setting</b> |                                                                                                         |                                                                                                                        |                                                                                                                                              |                                                                                                                                                     |
| Abbreviated Eligibility [Coversheet]                                                                                                              | Abbreviated Eligibility [Coversheet]                                                                    | Abbreviated Eligibility [Coversheet]                                                                                   | Abbreviated Eligibility [Coversheet]                                                                                                         | Abbreviated Eligibility [Coversheet]                                                                                                                |
| GSED Long form [LF]                                                                                                                               | GSED Long form [LF]                                                                                     | GSED Long form [LF]                                                                                                    | <b>GSED Long form [LF]</b>                                                                                                                   | <b>BSID III</b>                                                                                                                                     |
| CPAS                                                                                                                                              | CPAS                                                                                                    | CPAS                                                                                                                   | CPAS                                                                                                                                         | -----                                                                                                                                               |
| PHQ9                                                                                                                                              | PHQ9                                                                                                    | PHQ9                                                                                                                   | PHQ9                                                                                                                                         | -----                                                                                                                                               |
| Family support & Resilience Scale                                                                                                                 | Family support & Resilience Scale                                                                       | Family support & Resilience Scale                                                                                      | Family support & Resilience Scale                                                                                                            | -----                                                                                                                                               |
| <b>Visit 3 [Setting and timing vary by sub-sample]</b>                                                                                            |                                                                                                         |                                                                                                                        |                                                                                                                                              |                                                                                                                                                     |
| Visit 3 not required                                                                                                                              | Visit 3 [At home, clinic or other setting where the LF was completed- <b>within 24 hours</b> of the LF] | Visit 3 [At home, clinic or other setting where the LF was completed- this should happen <b>7 to 10 days after</b> LF] | Visit 3 [Clinic setting within <b>24- 72 hours</b> of the LF- can be done at same time as Visit 2 – taking child fatigue into consideration] | Visit 3 [Clinic setting within <b>24- 72 hours</b> of the BSID III - can be done at same time as Visit 2 – taking child fatigue into consideration] |
|                                                                                                                                                   | Abbreviated Eligibility [Coversheet]                                                                    | Abbreviated Eligibility [Coversheet]                                                                                   | Abbreviated Eligibility [Coversheet]                                                                                                         | Abbreviated Eligibility [Coversheet]                                                                                                                |
|                                                                                                                                                   | GSED Short form [SF]                                                                                    | GSED Short form [SF]                                                                                                   | <b>BSID III</b>                                                                                                                              | <b>GSED Long form [LF]</b>                                                                                                                          |
|                                                                                                                                                   | GSED Psychosocial form [PF]                                                                             | GSED Psychosocial form [PF]                                                                                            | -----                                                                                                                                        | CPAS                                                                                                                                                |
|                                                                                                                                                   | GSED Long form [LF]                                                                                     | GSED Long form [LF]                                                                                                    | -----                                                                                                                                        | PHQ9                                                                                                                                                |
|                                                                                                                                                   | -----                                                                                                   | -----                                                                                                                  | -----                                                                                                                                        | Family support & Resilience Scale                                                                                                                   |

\* Anthropometrics may be done either at visit 1 or visit 2

**Table S2b: Visit Schedule for the GSED Validation Study (the Netherlands only)**

| Main Study Only [No Sub-sample]                                                          | Inter- Rater Reliability Sub- Sample | Test- Retest Reliability Sub- Sample | Concurrent Sub- Sample 1 [LF First]                                                                                    | Concurrent Sub- Sample 2 [BSID III First]                                                                                     |
|------------------------------------------------------------------------------------------|--------------------------------------|--------------------------------------|------------------------------------------------------------------------------------------------------------------------|-------------------------------------------------------------------------------------------------------------------------------|
| <b>Session 1 [Online]</b>                                                                |                                      |                                      |                                                                                                                        |                                                                                                                               |
| Eligibility and Consent                                                                  | Eligibility and Consent              | Eligibility and Consent              | Eligibility and Consent                                                                                                | Eligibility and Consent                                                                                                       |
| Contextual                                                                               | Contextual                           | Contextual                           | Contextual                                                                                                             | Contextual                                                                                                                    |
| GSED Short form [SF]                                                                     | GSED Short form [SF]                 | GSED Short form [SF]                 | GSED Short form [SF]                                                                                                   | GSED Short form [SF]                                                                                                          |
| GSED Psychosocial scale [PS]                                                             | GSED Psychosocial scale [PS]         | GSED Psychosocial scale [PS]         | GSED Psychosocial scale [PS]                                                                                           | GSED Psychosocial scale [PS]                                                                                                  |
| <b>Visit 1 [At clinic within 48 hours of session1]</b>                                   |                                      |                                      |                                                                                                                        |                                                                                                                               |
| Abbreviated Eligibility [Coversheet]                                                     | Abbreviated Eligibility [Coversheet] | Abbreviated Eligibility [Coversheet] | Abbreviated Eligibility [Coversheet]                                                                                   | Abbreviated Eligibility [Coversheet]                                                                                          |
| GSED Long form [LF]                                                                      | GSED Long form [LF]                  | GSED Long form [LF]                  | <b>GSED Long form [LF]</b>                                                                                             | <b>BSID III</b>                                                                                                               |
| Anthropometrics                                                                          | Anthropometrics                      | Anthropometrics                      | Anthropometrics                                                                                                        | Anthropometrics                                                                                                               |
| <b>Session 2 [Online, Test-Retest of SF/PSY within 7 to 10 days of online session 1]</b> |                                      |                                      |                                                                                                                        |                                                                                                                               |
| Abbreviated Eligibility [Coversheet]                                                     | Abbreviated Eligibility [Coversheet] | Abbreviated Eligibility [Coversheet] | Abbreviated Eligibility [Coversheet]                                                                                   | Abbreviated Eligibility [Coversheet]                                                                                          |
| COVID Questionnaire                                                                      | COVID Questionnaire                  | COVID Questionnaire                  | COVID Questionnaire                                                                                                    | COVID Questionnaire                                                                                                           |
| -----                                                                                    | -----                                | GSED Short form [SF]                 | -----                                                                                                                  | -----                                                                                                                         |
| -----                                                                                    | -----                                | GSED Psychosocial scale [PS]         | -----                                                                                                                  | -----                                                                                                                         |
| CPAS                                                                                     | CPAS                                 | CPAS                                 | CPAS                                                                                                                   | CPAS                                                                                                                          |
| PHQ9                                                                                     | PHQ9                                 | PHQ9                                 | PHQ9                                                                                                                   | PHQ9                                                                                                                          |
| Family support & Resilience Scale                                                        | Family support & Resilience Scale    | Family support & Resilience Scale    | Family support & Resilience Scale                                                                                      | Family support & Resilience Scale                                                                                             |
| Family Care Indicators (FCI)                                                             | Family Care Indicators (FCI)         | Family Care Indicators (FCI)         | Family Care Indicators (FCI)                                                                                           | Family Care Indicators (FCI)                                                                                                  |
| <b>Visit 2 [At clinic, timing varies by sub-sample]</b>                                  |                                      |                                      |                                                                                                                        |                                                                                                                               |
| Visit 2 not required                                                                     | Visit 2 [within 24 hours of the LF]  | Visit 2 [7 to 10 days after LF]      | Visit 2 [within 24- 72 hours of the LF- can be done at same time as Visit 1 – taking child fatigue into consideration] | Visit 2 [within 24- 72 hours of the BSID III - can be done at same time as Visit 1 – taking child fatigue into consideration] |
|                                                                                          | Abbreviated Eligibility [Coversheet] | Abbreviated Eligibility [Coversheet] | Abbreviated Eligibility [Coversheet]                                                                                   | Abbreviated Eligibility [Coversheet]                                                                                          |
|                                                                                          | GSED Long form [LF]                  | GSED Long form [LF]                  | <b>BSID III</b>                                                                                                        | <b>GSED Long form [LF]</b>                                                                                                    |
